1 **Full Title: Delay-period activity in frontal, parietal, and occipital cortex tracks different**  
2 **attractor dynamics in visual working memory**

3

4 **Short Title: Neural correlates of attractor dynamics in visual working memory**

5

6 **Authors:**

7 Qing Yu<sup>1</sup>, Matthew F. Panichello<sup>3</sup>, Ying Cai<sup>5</sup>, Bradley R. Postle<sup>1,2</sup>, Timothy J. Buschman<sup>3,4</sup>

8 **Affiliations:**

9 <sup>1</sup>Department of Psychiatry, University of Wisconsin–Madison, Madison, WI 53719, USA

10 <sup>2</sup>Department of Psychology, University of Wisconsin–Madison, Madison, WI 53706, USA

11 <sup>3</sup>Princeton Neuroscience Institute, Princeton University, Princeton, NJ 08540, USA

12 <sup>4</sup>Department of Psychology, Princeton University, Princeton, NJ 08540, USA

13 <sup>5</sup>Department of Psychology and Behavioral Sciences, Zhejiang University, Hangzhou, Zhejiang,  
14 310007, China

15

16 **Corresponding author:**

17 Qing Yu

18 Department of Psychiatry

19 University of Wisconsin-Madison

20 Madison, WI 53719, USA

21 Email: qyu55@wisc.edu

22

23

24

25

## 26 **Abstract**

27           One important neural hallmark of working memory is persistent elevated delay-period  
28 activity in frontal and parietal cortex. In human fMRI, delay-period BOLD activity in frontal and  
29 parietal cortex increases monotonically with memory load and asymptotes at an individual's  
30 capacity. Previous work has demonstrated that frontal and parietal delay-period activity  
31 correlates with the decline in behavioral memory precision observed with increasing memory  
32 load. However, because memory precision can be influenced by a variety of factors, it remains  
33 unclear what cognitive processes underlie persistent activity in frontal and parietal cortex. Recent  
34 psychophysical work has shown that attractor dynamics bias memory representations toward a  
35 few stable representations and reduce the effects of internal noise. From this perspective,  
36 imprecision in memory results from both drift towards stable attractor states and random  
37 diffusion. Here we asked whether delay-period BOLD activity in frontal and parietal cortex  
38 might be explained, in part, by these attractor dynamics. We analyzed data from an existing  
39 experiment in which subjects performed delayed recall for line orientation, at different loads,  
40 during fMRI scanning. We modeled subjects' behavior using a discrete attractor model, and  
41 calculated within-subject correlation between frontal and parietal delay-period activity and  
42 estimated sources of memory error (drift and diffusion). We found that although increases in  
43 frontal and parietal activity were associated with increases in both diffusion and drift, diffusion  
44 explained the most variance in frontal and parietal delay-period activity. In comparison, a  
45 subsequent whole-brain regression analysis showed that drift rather than diffusion explained the  
46 most variance in delay-period activity in lateral occipital cortex. These results provide a new  
47 interpretation for the function of frontal, parietal, and occipital delay-period activity in working  
48 memory.

## 49 **Introduction**

50 Working memory – the ability to mentally retain and manipulate information to guide  
51 behavior – is crucial for many aspects of high-level cognition [1-3]. One prominent neural  
52 hallmark of working memory performance is persistent elevated delay-period activity in frontal  
53 and parietal cortex. Specifically, blood oxygen level-dependent (BOLD) activity in frontal and  
54 parietal cortex increases monotonically with memory load and asymptotes at an individual’s  
55 memory capacity [4, 5]. Activity in these networks is thought to reflect the engagement of  
56 control [6, 7]. For example, one recent study has demonstrated that persistent activity in parietal  
57 cortex tracks the demands of binding stimulus content to its trial-specific context, rather than  
58 memory load per se [8]. These signals have been shown to correlate with individual memory  
59 capacity [4, 5] and with memory precision [8-10]. In contrast, persistently elevated activity  
60 during the delay period is often absent in occipital cortex, despite the reliable representation of  
61 stimulus-specific information [8, 10-13].

62 Recent psychophysical work has shown that inaccuracies in working memory are due to  
63 both random error and systematic biases. For example, when subjects remember features drawn  
64 from a uniform stimulus space, their responses are not uniform. Instead, the responses “cluster”  
65 around a small number of specific values [14-16]. Further modeling work has demonstrated this  
66 clustering can be explained by attractor dynamics that pull memories to specific locations in  
67 mnemonic space (i.e. color memories are ‘attracted’ to red). While this induces systematic error  
68 into the memories, it also stabilizes memories near the attractors [16]. Thus, engaging attractor  
69 dynamics is thought to be especially beneficial when memory load is higher, because increased  
70 noise in stimulus representations can be counteracted by increasing drift towards a few stable  
71 representations.

72           Because load-related imprecision in working memory performance reflects both random  
73 diffusion and drift towards stable attractor states, it remains unclear which of these dynamics  
74 could account for load-sensitive delay-period activity in parietal and frontal cortex. In the current  
75 study, we analyzed data from an existing experiment in which subjects performed delayed recall  
76 for line orientation, at different memory loads, during fMRI scanning. We modeled subjects'  
77 behavior using a discrete attractor model, and regressed the resultant load-sensitive estimates of  
78 drift and diffusion against load-dependent delay-period activity in parietal and frontal cortex. We  
79 found that an increase in frontal and parietal activity was associated with increases in both  
80 diffusion and drift. Furthermore, diffusion rather than drift explained the most variance in frontal  
81 and parietal delay-period activity. In comparison, a subsequent whole-brain regression analysis  
82 showed that drift rather than diffusion explained the most variance in delay-period activity in  
83 lateral occipital cortex. The results provided a novel interpretation of the functions associated  
84 with delay-period activity, suggesting frontoparietal control networks may be engaged to offset  
85 load-related diffusive noise while load-related drift is localized to occipital cortex.

86

## 87 **Results**

### 88 *Behavioral performance*

89           Subjects performed a delayed estimation task on line orientations. On different trials,  
90 subjects either remembered one orientation (*1O*), or three different orientations (*3O*). For  
91 subjects who participated in the fMRI sessions, we first plotted the distribution of their raw  
92 responses ( $n = 16$ ), separately for *1O* and *3O* trials. Recall error, measured as the angular  
93 distance between the target orientation and response orientation, increased with increasing  
94 memory load,  $t(15) = 8.27, p = 5.68 \times 10^{-7}$ . Furthermore, similar to what has been previously

95 reported for color [14-16], subjects' responses to orientation working memory also clustered  
96 around a small number of orientations (Figure 1B).

97 To account for these clusters, we fit the behavioral data with the drift-diffusion model  
98 (DDM), which included drift towards attractor locations. For comparison, we also fit the  
99 'diffusion-only' model (DOM). Consistent with previous work on color working memory [16],  
100 the DDM provided a better fit to behavior than the DOM (difference in cross-validated log-  
101 likelihood = 3.67). For the DDM, the diffusion and the drift parameters both increased with  
102 memory load ( $t(15) = 4.86, p = 0.0002$  and  $t(15) = 2.43, p = 0.028$ , respectively), as did the  
103 diffusion parameter from the DOM ( $t(15) = 6.52, p = 9.67 \times 10^{-6}$ ; Figure 1C). When we repeated  
104 these analyses on the full set of behavioral data ( $n = 30$ ; including behavior-only subjects), all  
105 results were qualitatively similar to those reported above (the average difference in cross-  
106 validated log-likelihood across folds was 6.56 between DDM and DOM).

107

108 <Insert Figure 1 about here>

109

#### 110 *BOLD signal change in IPS and PFC*

111 We next examined the BOLD time course in IPS and in PFC during the working memory  
112 task, at the two memory loads. We observed the classic pattern of load-sensitive BOLD activity  
113 in both ROIs: signal intensity was sustained above baseline across the delay period in both load  
114 conditions (all  $ps < 0.001$ ), with greater activity for the higher memory load condition (all  $ps <$   
115  $0.01$ , including the "late-delay" TR, at which BOLD-behavior analyses were carried out; Figure  
116 2A and 2B).

117

118 <Insert Figure 2 about here>

119

120 *Modeling load-dependent BOLD activity with behavior at the ROI level*

121 To relate load-dependent BOLD activity in parietal and frontal cortex to behavior, we  
122 fitted linear regression models with behavioral-model fitted parameters and subject as the  
123 independent variables, and BOLD activity as the dependent variable. We first used these  
124 regression models to calculate within-subject correlations (ANCOVAs) between behavioral  
125 parameters (drift and diffusion) and BOLD activity. The results indicated that BOLD activity in  
126 both ROIs correlated significantly with diffusion (IPS diffusion:  $r = 0.83$ ,  $p = 0.00004$ ; PFC  
127 diffusion:  $r = 0.79$ ,  $p = 0.0002$ ) and drift (IPS drift:  $r = 0.59$ ,  $p = 0.012$ ; PFC drift:  $r = 0.61$ ,  $p =$   
128  $0.009$ ; Figure 2C and 2D).

129 Next, to evaluate the contribution of drift and diffusion, we found the regression model  
130 that best explained BOLD activity in the two ROIs. Comparison between the four models of  
131 interest indicated that Model 2 (BOLD  $\sim$  diffusion (DDM) + subject) explained the most  
132 variance in BOLD activity in both IPS and PFC ROIs, and showed the best model performance  
133 in terms of AIC and BIC (See Table 1 for a complete list of model comparisons).

134 We also used stepwise regression to examine the relative contribution of drift and  
135 diffusion to the prediction of BOLD activity. Starting from Model 3 (BOLD  $\sim$  drift (DDM) +  
136 diffusion (DDM) + subject), stepwise regression removed drift from the model for both IPS  
137 ( $F(1,14) = 0.35$ ,  $p = 0.564$ ) and PFC ( $F(1,14) = 0.84$ ,  $p = 0.376$ ), but retained diffusion for both  
138 ROIs (diffusion vs. constant model: IPS:  $F(32,15) = 4.37$ ,  $p = 0.003$ ; PFC:  $F(32,15) = 4.36$ ,  $p =$   
139  $0.003$ ). Together, these results suggest the level of BOLD activity in both IPS and PFC is most  
140 strongly correlated with the amount of diffusive noise in memories.

141

142

<Insert Table 1 about here>

143

144 *Modeling load-dependent BOLD activity with behavior at the whole-brain level*

145

146

147

148

149

Lastly, we performed a whole-brain linear regression analysis to explore the relative contribution of drift and diffusion to the BOLD activity of each voxel. Consistent with our ROI-based results, we found significant clusters in bilateral IPS and left frontal cortex with load-dependent BOLD activity that can be better explained by load-dependent changes in diffusion (Figure 3A, red clusters).

150

151

<Insert Figure 3 about here>

152

153

154

155

156

157

158

Interestingly, we also observed clusters that showed higher brain-behavior correlation with drift (Figure 3A, green clusters). These clusters were most prominent in the lateral occipital cortex (LO), in superior postcentral gyrus bilaterally and in right inferior precentral gyrus. Because of the known involvement of occipital cortex in visual working memory, we defined two anatomical ROIs for LO (LO1 and LO2) and repeated with them the ROI-based analyses as previously performed for IPS and PFC.

159

160

161

162

163

Consistent with previous findings [8, 10-13], BOLD signal intensity in the two LO ROIs returned to baseline during the delay period, with late-delay period activity no different from baseline on *IO* trials (LO1:  $t(15) = 0.300$ ,  $p = 0.868$ ; LO2:  $t(15) = 0.315$ ,  $p = 0.845$ ) and slightly below-baseline on *3O* trials (LO1:  $t(15) = 2.754$ ,  $p = 0.021$ ; LO2:  $t(15) = 2.369$ ,  $p = 0.043$ ; Figure 3B and 3C). ANCOVAs between the behavioral parameters from the DDM and this

164 BOLD activity revealed trending correlations with drift (LO1:  $r = -0.48$ ,  $p = 0.054$ ; LO2:  $r = -$   
165  $0.44$ ,  $p = 0.081$ ) and less so with diffusion (LO1:  $r = -0.44$ ,  $p = 0.079$ ; LO2:  $r = -0.34$ ,  $p = 0.18$ ;  
166 Figure 3D and 3E). Furthermore, stepwise regression on Model 3 removed diffusion from the  
167 model for both LO1 ( $F(1,14) = 0.59$ ,  $p = 0.456$ ) and LO2 ( $F(1,14) = 0.13$ ,  $p = 0.727$ ), while drift  
168 remained in models for both ROIs (drift vs. constant model: LO1:  $F(32,15) = 3.98$ ,  $p = 0.005$ ;  
169 LO2:  $F(32,15) = 4.2$ ,  $p = 0.004$ ). This result was opposite of what was observed in the IPS and  
170 PFC ROIs.

171

## 172 **Discussion**

173 The results of this study provide a new account of the function of load-sensitive activity  
174 in IPS and PFC [4, 5]. First, consistent with previous work with color working memory, here we  
175 showed that attractor dynamics provided a better account of behavioral data of orientation  
176 working memory, compared with classic mixture models that did not take attractor biases into  
177 account. Next, and most importantly, the diffusion parameter from the discrete attractor model  
178 provided the best account of the load-sensitive delay-period activity of IPS and PFC. In contrast,  
179 in LO where aggregate levels of late delay-period activity were at or below baseline levels, load-  
180 sensitive fluctuation in this activity was better explained by drift. Thus, our results provide the  
181 first evidence to our knowledge that load-related imprecision in working memory, known to  
182 entail increases in random diffusion and in drift towards stable attractor state, engages control-  
183 related circuits of IPS and PFC and sensory-related circuits of LO, respectively.

184 By definition, working memory is guided by information specific to the current trial.  
185 Nevertheless, working memory is also often influenced by many other factors, such as sensory  
186 history [17] and prior knowledge. In working memory for color, the influence of prior



187 knowledge is reflected as clustered responses around a small number of specific color values,  
188 even when the distribution of sample colors is uniform [14-16]. The present results show that this  
189 phenomenon generalizes to another low-level visual feature, orientation, and these biases  
190 increased with increasing memory load. Together with those of Panichello et al. (2019), our  
191 results indicate that dynamical systems offer a useful framework within which to understand the  
192 influence of trial-nonspecific factors on working memory performance.

193       Neurally, delay-period neural activity in IPS and PFC increased with increasing memory  
194 load, and we showed that this load-dependent change in BOLD activity was mainly related to  
195 load-dependent changes in diffusion rather than drift. Therefore, load-related activity change in  
196 IPS and PFC is likely related to random diffusion processes, rather than systematic biases  
197 towards attractors. The random noise could be related to noise in representations when memories  
198 are held in IPS/PFC or related to greater engagement of control processes when working memory  
199 has greater diffusion. For example, a recent study has found that delay-period activity in IPS is  
200 more sensitive to the demands of context binding than of memory load per se. By this account,  
201 increases in diffusion were likely due, at least in part, to increased interference between  
202 representations of stimulus content and stimulus context, which would be expected to place  
203 greater demands on a frontoparietal priority map controlling visually guided behavior [8]. In  
204 comparison, load-related activity in LO was more sensitive to load-related changes in drift to  
205 particular stimulus values, rather than diffusion. This result is consistent with the idea that prior  
206 knowledge shapes feature tuning in visual cortex, resulting in biased tuning responses to  
207 different visual features at early stages of cortical processing [18].

208       When considering these findings, it is important to not think of these factors as working  
209 in isolation. In frontoparietal cortex, for example, estimating drift is still necessary, as it allows

210 for a more accurate model of diffusion, that can better predict neural signals in these regions.  
211 Moreover, it is important to note that in terms of parameter fitting, the drift parameter relies  
212 inferring the shape of attractor landscape across the entire stimulus space, and therefore both the  
213 number of trials and the uniformity of target distribution can have a significant impact on the  
214 fitted outcome. It is possible that future studies acquiring more trials, and/or applying more  
215 uniformly distributed targets, will lead to improved model fit of drift, and increases in the  
216 variance explained by this parameter.

217 In previous studies emphasizing stimulus-specific representations of visual working  
218 memory, we have argued that disparate patterns of results in frontoparietal versus occipital  
219 cortex are consistent with a functional distinction between these two regions, with the former  
220 more strongly associated with control and the latter with stimulus representation [8, 10]. Here,  
221 we see that stimulus-nonspecific factors, as reflected in the relationship between load-dependent  
222 changes in behavior (drift and diffusion) and delay-period activity, are also consistent with this  
223 distinction. Taken together, the results from higher-order frontal and parietal cortex and low-  
224 level occipital cortex suggest that imprecision in working memory can be caused by a  
225 combination of effects of noise in parietal and frontal cortex, and of stimulus-related biases in  
226 occipital cortex.

227

## 228 **Method**

### 229 *Subjects*

230 The results reported here are from analyses carried out on existing data collected for other  
231 purposes [19, 20]. Thirty individuals (10 males, mean age  $20.7 \pm 2.3$  years) participated in the  
232 behavioral session of the study, and sixteen of these (8 males, mean age  $20.6 \pm 1.8$  years) also

233 participated in two subsequent fMRI scanning sessions. All were recruited from the University of  
234 Wisconsin–Madison community. All had normal or corrected-to-normal vision, reported no  
235 neurological or psychiatric disease, and provided written informed consent approved by the  
236 University of Wisconsin–Madison Health Sciences Institutional Review Board. Anatomical  
237 scans from the fMRI session were also screened by a neuroradiologist, and no abnormalities  
238 were detected. All subjects were monetarily compensated for their participation.

239

#### 240 *Stimuli and procedure*

241 All stimuli were created and presented using Matlab (MathWorks, Natick, MA) and  
242 Psychtoolbox 3 extensions [21, 22]. In the behavioral session, stimuli were presented at a  
243 viewing distance of 62 cm on an iMac screen, with a refresh rate of 60 Hz. Subjects registered  
244 behavioral responses on a trackball response pad. In the fMRI session, stimuli were projected  
245 onto a 60-Hz Avotec Silent Vision 6011 projector (Avotec, Stuart, FL), and viewed through a  
246 coil-mounted mirror in the MRI scanner at a viewing distance of 69 cm. Subjects registered  
247 behavioral responses on a MR-compatible trackball response pad (Current Designs Inc.,  
248 Philadelphia, PA).

249 There were three types of stimuli: oriented bars, color patches, or luminance patches.  
250 Each oriented-bar stimulus appeared as a black line (width =  $0.08^\circ$ ) bisecting a white circle  
251 (radius =  $2^\circ$ ). Line orientations were drawn from a pool of 9 orientations ranging from 0 to  $160^\circ$ ,  
252 in  $20^\circ$  increments, with a random jitter of  $1\text{--}5^\circ$  added to each stimulus. Color patches were  
253 circular patches (radius =  $2^\circ$ ) filled with one color drawn from a pool of 9 colors that were  
254 equidistant in CIEL\*a\*b color space ( $L = 70$ ,  $a = 20$ ,  $b = 38$ , radius =  $60^\circ$ ), with a random jitter  
255 of  $1\text{--}5^\circ$ . Luminance patches were rendered as a gray circular patch (radius =  $0.83^\circ$ ) inside a white

256 annulus (radius =  $2^\circ$ ), and the luminance of the patches were drawn from 9 grayscale values from  
257 [0.03, 0.03, 0.03] to [0.97, 0.97, 0.97], in steps of 0.1175. Throughout the experiment, the  
258 background screen color was gray [0.5, 0.5, 0.5].

259         There were three different trial types. On “*IO*” trials, one oriented bar was presented at  
260 one of four possible locations ( $45^\circ$ ,  $135^\circ$ ,  $225^\circ$ ,  $315^\circ$  relative to central fixation, with an  
261 eccentricity of  $5^\circ$ ) for 4 s. Stimulus offset was followed by a mask (white circle [radius =  $2^\circ$ ]  
262 bisected by 18 black bars [width =  $0.08^\circ$ ] intersecting at their midpoints and each differing in  
263 orientation from its neighbors by  $10^\circ$ ; 0.25 s) and a delay period (7.75 s) during which subjects  
264 maintained central fixation. Recall was prompted by the onset of a stimulus circle appearing at  
265 the same location as the sample, a response wheel centered on fixation (inner radius =  $7.2^\circ$ , outer  
266 radius of  $9.2^\circ$ ), and a cursor (a conventional “mouse” arrow) located at central fixation. Twenty  
267 oriented lines (radius =  $1.8^\circ$ , width =  $0.05^\circ$ , ranging in orientation from  $0^\circ$  to  $171^\circ$  in steps of  $9^\circ$ )  
268 were displayed with equal spacing along the response wheel, and subjects registered their  
269 memory of the sample orientation by moving the cursor to the appropriate location on the  
270 response wheel and registering that location with a button press. At the onset of the recall  
271 display, the stimulus patch was rendered with a randomly determined value rendered in the  
272 format of the sample stimuli, and as soon as the subject began to move the cursor (with the  
273 trackball) the stimulus patch took on the value corresponding to the location on the response  
274 wheel that was nearest to the cursor. Responses were required within 4 s, while the circle and  
275 wheel remained on the screen. The angle of rotation of the response wheel was randomized  
276 across trials, to prevent subjects from preparing their response during the delay period.

277         “*3O*” trials were similar to “*IO*” trials, except three oriented bars, each with a different  
278 orientation, were displayed in three of the four possible sample locations, and, at time 12 s, the

279 sample to be recalled was indicated by the location of the stimulus circle in the recall array. For  
280 each *3O* trial, sample values were selected randomly, without replacement, from the pool of 9  
281 possible orientations (Figure 1A).

282 On “*IOICIL*” trials, 1 oriented bar, 1 color patch, and 1 luminance patch were presented,  
283 and during the response stage subjects were tested, unpredictably, on their memory for one of  
284 these stimuli. The response wheel for color and luminance was the same size as the orientation  
285 wheel, but displayed 180 possible color or luminance values.

286 The behavioral session contained two blocks of *IO* and *3O* trials, and three blocks of  
287 *IOICIL* trials. Each block contained 50 trials, and block order was counterbalanced across  
288 subjects. The *IO* and *3O* blocks contained 25 trials each for *IO* and *3O*, and the *IOICIL* blocks  
289 contained 17 probes of two of the three categories, and 16 of the remaining one. The selection of  
290 the categories was randomized across blocks, yielding 50 trials for each category across three  
291 blocks.

292 There were two fMRI scanning sessions. The first scanning session included four 18-trial  
293 blocks of 9 *3O* trials and 9 *IOICIL* trials (with 3 probes each for orientation, color, and  
294 luminance), yielding a total of 36 trials for each of these load-of-3 trial types. These four blocks  
295 were followed by eight 18-trial blocks of *IO* trials. The second session included twelve blocks of  
296 *IO* trials. To match the number of trials between conditions in fMRI data, two of the twenty *IO*  
297 blocks were randomly selected for each subject for further analyses.

298 We introduce the *IOICIL* condition here only for the completeness of experimental  
299 design. All subsequent analyses focused on *IO* and *3O* trials for load-related changes in  
300 behavioral and neural data.

301

302 *Behavioral modeling*

303 We fitted data from the behavioral session using a discrete attractor model [16]. This  
304 circular drift-diffusion model (DDM) fits the dynamic evolution of memories with two distinct  
305 processes: random noise (*diffusion*); and systematic *drift* towards one of several stable attractors.  
306 Notably, when the drift parameter is removed, the remaining diffusion-only model (DOM) is  
307 equivalent to a classic mixture model [23]. Both parameters are rates, with a unit of rad/s  
308 indicating the rate of diffusion and the maximum instantaneous drift rate. Unlike the Panichello  
309 et al. (2019) study, here we fitted behavioral data without separating out encoding and delay  
310 processes, because the length of memory delays was not manipulated in this experiment. The  
311 comparison between performance of the DDM and DOM models was evaluated by computing a  
312 10-fold cross-validated log-likelihood value.

313

314 *fMRI Data acquisition*

315 Whole-brain images were acquired with a 3 Tesla GE MR scanner (Discovery MR750;  
316 GE Healthcare, Chicago, IL) at the Lane Neuroimaging Laboratory at the University of  
317 Wisconsin–Madison HealthEmotions Research Institute (Department of Psychiatry). Functional  
318 images were acquired with a gradient-echo echo-planar sequence (2 sec repetition time (TR), 25  
319 msec echo time (TE), 60° flip angle) within a 64 × 64 matrix (40 sagittal slices, 3.5mm  
320 isotropic). Each of the fMRI scans generated 215 volumes. A high-resolution T1 image was also  
321 acquired for each session with a fast spoiled gradient-recalled-echo sequence (8.2 msec TR, 3.2  
322 msec TE, 12° flip angle, 172 axial slices, 256 × 256 in-plane, 1.0 mm isotropic).

323

324 *fMRI Data preprocessing*

325           Functional MRI data were preprocessed using AFNI (<http://afni.nimh.nih.gov>) [24]. The  
326 data were first registered to the first volume of the first run, and then to the T1 volume of the first  
327 scan session. Six nuisance regressors were included in GLMs to account for head motion  
328 artifacts in six different directions. The data were then motion corrected, detrended (linear,  
329 quadratic, cubic), converted to percent signal change, and spatially smoothed with a 4-mm  
330 FWHM Gaussian kernel. For the whole-brain analysis, the data were further aligned to the MNI-  
331 ICBM 152 space [25].

332

### 333 *Region of interest (ROI) definition*

334           We first defined anatomical ROIs using existing anatomical atlases, and warped them  
335 back to each subject's structural scan in native space. Parietal anatomical ROIs were created by  
336 extracting intraparietal sulcus (IPS) masks IPS0-5 from the probabilistic atlas of Wang and  
337 colleagues [26], merging them, and collapsing over the right and left hemispheres. Lateral  
338 prefrontal cortex (PFC) anatomical ROIs were created by extracting masks of the superior,  
339 middle, and inferior frontal gyri supplied by AFNI, merging them, and collapsing over the right  
340 and left hemispheres. Lateral occipital anatomical ROIs were created by extracting masks for  
341 LO1 and LO2, from the probabilistic atlas of Wang and colleagues [26], merging them, and  
342 collapsing over the right and left hemispheres.

343           To find the functionally activated voxels within the anatomical atlases, a conventional  
344 mass-univariate general linear model (GLM) analysis was implemented in AFNI, with sample,  
345 delay and probe periods of the task modeled with boxcars (4 sec, 8 sec, and 4 sec in length,  
346 respectively) that were convolved with a canonical hemodynamic response function. Across the  
347 whole brain, we identified the 2000 voxels displaying the strongest loading on the contrast [delay

348 - baseline], collapsing over all three conditions. The intersection of these 2000 voxels and the  
349 two anatomical masks defined the two functional ROIs in subsequent analyses: the IPS ROI and  
350 the PFC ROI. On average, the IPS functional ROI contained  $463 \pm 177$  voxels, the PFC  
351 functional ROI contained  $314 \pm 86$  voxels; the two anatomical LO ROIs contained  $404 \pm 57$  and  
352  $456 \pm 69$  voxels, respectively.

353

#### 354 *Univariate analyses*

355 We calculated the percent signal change in BOLD activity relative to baseline for each  
356 time point during the working memory task; baseline was chosen as the average BOLD activity  
357 of the first TR of each trial. The BOLD signal change was averaged across trials within each  
358 condition, and across all voxels within each ROI. Statistical significance of BOLD activity  
359 against baseline was assessed using two-tailed, one-sample t-tests against 0, and the obtained  $p$   
360 values were corrected across loads and time points using FDR (False Discovery Rate) [27].  
361 Statistical difference of BOLD activity between  $1O$  and  $3O$  at each time point was assessed  
362 using two-tailed paired t-tests, and similarly the obtained  $p$  values were FDR corrected across  
363 time points.

364

#### 365 *Brain-behavior correlation and model comparisons*

366 Following previous work [8-10], we used an analysis of covariance (ANCOVA) method  
367 to evaluate the correlated sensitivity to trial type (i.e.,  $1O$  vs.  $3O$ ) across pairs of task-related  
368 variables (i.e., BOLD activity vs. behavioral parameter). Unlike simple correlations, ANCOVA  
369 accommodates the fact that each subject contributes a value for each level of trial type. It



370 removes between-subject differences and assesses evidence for “within-subject correlation”  
371 between the two task-related variables [28].

372 Mathematically, within-subject correlations were implemented as linear regression  
373 models, and were calculated for *drift* and *diffusion* separately, where *subject* is a dummy variable  
374 for trial types (*1O* and *3O*) of each subject, and *BOLD* is BOLD signal from time 12 s (“late  
375 delay-period” activity):

376 Model 1:  $BOLD \sim \text{drift (DDM)} + \text{subject}$ ;

377 Model 2:  $BOLD \sim \text{diffusion (DDM)} + \text{subject}$ ;

378 The within-subject correlation  $r$  for drift or diffusion was calculated as:

379 
$$r = \frac{\sqrt{SS_{\text{drift or diffusion}}}}{\sqrt{SS_{\text{drift or diffusion}} + SS_{\text{error}}}}$$

380 where SS stands for sum of squares.

381 To compare between the performance of different regression models, we included two  
382 more models, one full model that took both drift and diffusion into account, and one control  
383 model that used diffusion from the DOM model:

384 Model 3:  $BOLD \sim \text{drift (DDM)} + \text{diffusion (DDM)} + \text{subject}$ ;

385 Model 4:  $BOLD \sim \text{diffusion (DOM)} + \text{subject}$ .

386 Model performance was evaluated by comparing Akaike Information Criterion (AIC),  
387 Bayesian Information Criterion (BIC), and adjusted  $R^2$  (explained variance of the model after  
388 adjusting for the number of predictors) of each model.

389 Lastly, we performed stepwise regression to evaluate the contribution of the drift and  
390 diffusion parameters to the prediction of BOLD activity. The regression model started with  
391 Model 3, after the initial fit, the predictors in the model were examined one by one, and the  
392 predictor with a  $p > 0.10$  in the  $F$  test after removal was removed.

393

394 *Whole-brain regression analysis*

395       To explore brain areas that showed activity sensitive to either the drift or diffusion  
396 parameter, we used a whole-brain exploratory analysis to find voxels with activity that can be  
397 best explained by either drift or diffusion. To this end, all subjects' data were first normalized to  
398 the MNI-ICBM 152 space [25], and for each voxel we fit Models 1 and 2 to the BOLD activity  
399 of that voxel. The model with a higher adjusted  $R^2$  for each voxel was selected as the best fitting  
400 for that voxel, and we used the  $p$ -value of the selected model ( $F$ -test on regression vs. constant  
401 model) for statistical significance. To correct for multiple comparisons, we applied the False  
402 Discovery Rate (FDR) method to the  $p$ -values of the selected model across voxels. To avoid  
403 overinterpretation, we also applied a threshold in model selection using BIC [29], such that only  
404 voxels with a significant  $p$ -value after correction, and in which the drift or diffusion model  
405 outperformed the other by a BIC  $\geq 2$ , remained in the final report. Therefore, we identified  
406 voxels with load-dependent BOLD activity that could be better explained by load-dependent  
407 changes in drift, or in diffusion, at the whole-brain level. Results from the whole-brain analysis  
408 were displayed on the cortical surface reconstructed with FreeSurfer  
409 (<http://surfer.nmr.mgh.harvard.edu>; [30, 31]) and visualized with SUMA in AFNI  
410 (<http://afni.nimh.nih.gov>) [24].

411

412

## Figure Legends

### 413 **Figure 1A. Trial sequence of the fMRI task and Behavioral performance**

414 **A.** For the data analyzed in the current study, participants remembered either one orientation  
415 (*1O*), or three orientations (*3O*). Sample stimuli were presented on the screen for 4 s, followed  
416 by a brief mask period of 0.25 s. After a delay of 7.75 s, participants rotated the needle of the  
417 response wheel to indicate the remembered orientation at the probed location.

418 **B.** The raw response distribution of *1O* and *3O* trials, indicated by the gray histograms. The  
419 black lines indicate the envelope of target distribution, and pink and green lines indicate the  
420 envelope of response distribution, for *1O* and *3O* trials separately.

421 **C.** Model-free and model-based behavioral performance. From left to right panel shows mean  
422 error, diffusion from the DOM model, drift from the DDM model, and diffusion from the DDM  
423 model. Error bars indicate  $\pm 1$  SEM.

424

### 425 **Figure 2. BOLD activity and brain-behavior correlations in IPS and PFC**

426 **A.** Trial-averaged BOLD activity in the IPS functional ROI. **B.** Time course of BOLD activity in  
427 the PFC functional ROI. Pink and green lines correspond to the *1O* and *3O* conditions,

428 respectively. Error bars indicate  $\pm 1$  SEM. **C.** Within-subject correlations between behavioral

429 parameter from DDM (drift and diffusion plotted separately) and IPS BOLD activity, at “late

430 delay” time point (12 s). **D.** within-subject correlations between behavioral parameter (drift or

431 diffusion) and PFC BOLD activity. In each plot, data from each subject are plotted in a different

432 color, and the “1” and “3” symbols correspond to values from *1O* and *3O* trials, respectively.

433 Lines illustrate the best fit of the group-level linear trend (i.e., the within-subject correlation) in

434 relation to individual subject data.

435

436 **Figure 3. Whole-brain regression analysis with drift and diffusion and ROI-based results in**

437 **LO**

438 **A.** Whole-brain regression with drift and diffusion. Green denotes voxels showing load-

439 dependent BOLD activity that can be better explained by load-dependent changes in drift, and

440 Red denotes voxels showing load-dependent BOLD activity that can be better explained by load-

441 dependent changes in diffusion. For visualization purposes, results were clusterized at a

442 threshold of 20 voxels. The left two panels show results from the left hemisphere, and the right

443 two panels show results from the right hemisphere. The significance of the regression models

444 was corrected using the FDR method at  $p < 0.05$ .

445 **B.** Trial-averaged BOLD activity in the LO1 anatomical ROI. **C.** Time course of BOLD activity

446 in the LO2 anatomical ROI. Pink and green lines correspond to the *1O* and *3O* conditions,

447 respectively. Error bars indicate  $\pm 1$  SEM. **D.** Within-subject correlations between behavioral

448 parameter from DDM (drift and diffusion plotted separately) and LO1 BOLD activity, at “late

449 delay” time point (12 s). **E.** within-subject correlations between behavioral parameter (drift or

450 diffusion) and LO2 BOLD activity. In each plot, data from each subject are plotted in a different

451 color, and the “1” and “3” symbols correspond to values from *1O* and *3O* trials, respectively.

452 Lines illustrate the best fit of the group-level linear trend (i.e., the within-subject correlation) in

453 relation to individual subject data.

454

455 **Table 1:** Comparison between different regression models

| <b>Model</b> | <b>adjusted R<sup>2</sup></b> | <b>AIC</b> | <b>BIC</b> |
|--------------|-------------------------------|------------|------------|
| <b>IPS</b>   |                               |            |            |

|            |       |         |         |
|------------|-------|---------|---------|
| Model 1    | 0.237 | 29.3792 | 54.2967 |
| Model 2    | 0.635 | 5.7543  | 30.6718 |
| Model 3    | 0.619 | 6.9660  | 33.3493 |
| Model 4    | 0.580 | 10.2552 | 35.1757 |
| <b>PFC</b> |       |         |         |
| Model 1    | 0.412 | 14.1163 | 39.0338 |
| Model 2    | 0.659 | -3.2714 | 21.6461 |
| Model 3    | 0.652 | -2.8174 | 23.5658 |
| Model 4    | 0.566 | 4.3899  | 29.3075 |

456

457

458 **Acknowledgements**

459 This work was supported by NIMH R01MH064498 to B.R.P., and ONR N000141410681 and

460 NIMH R01MH115042 to T.J.B.

## 461 References

- 462 1. Engle RW, Tuholski SW, Laughlin JE, Conway AR. Working memory, short-term  
463 memory, and general fluid intelligence: a latent-variable approach. *J Exp Psychol Gen.*  
464 1999;128(3):309-31. Epub 1999/10/08. PubMed PMID: 10513398.
- 465 2. Baddeley A. Working memory: looking back and looking forward. *Nat Rev Neurosci.*  
466 2003;4(10):829-39. Epub 2003/10/03. doi: 10.1038/nrn1201. PubMed PMID: 14523382.
- 467 3. Luck SJ, Vogel EK. Visual working memory capacity: from psychophysics and  
468 neurobiology to individual differences. *Trends Cogn Sci.* 2013;17(8):391-400. Epub 2013/07/16.  
469 doi: 10.1016/j.tics.2013.06.006. PubMed PMID: 23850263; PubMed Central PMCID:  
470 PMCPMC3729738.
- 471 4. Todd JJ, Marois R. Capacity limit of visual short-term memory in human posterior  
472 parietal cortex. *Nature.* 2004;428(6984):751-4. Epub 2004/04/16. doi: 10.1038/nature02466.  
473 PubMed PMID: 15085133.
- 474 5. Xu Y, Chun MM. Dissociable neural mechanisms supporting visual short-term memory  
475 for objects. *Nature.* 2006;440(7080):91-5. Epub 2005/12/31. doi: 10.1038/nature04262. PubMed  
476 PMID: 16382240.
- 477 6. Nelissen N, Stokes M, Nobre AC, Rushworth MF. Frontal and parietal cortical  
478 interactions with distributed visual representations during selective attention and action selection.  
479 *J Neurosci.* 2013;33(42):16443-58. Epub 2013/10/18. doi: 10.1523/JNEUROSCI.2625-13.2013.  
480 PubMed PMID: 24133250; PubMed Central PMCID: PMCPMC3797369.
- 481 7. Ma WJ, Husain M, Bays PM. Changing concepts of working memory. *Nat Neurosci.*  
482 2014;17(3):347-56. Epub 2014/02/27. doi: 10.1038/nn.3655. PubMed PMID: 24569831;  
483 PubMed Central PMCID: PMCPMC4159388.
- 484 8. Gosseries O, Yu Q, LaRocque JJ, Starrett MJ, Rose NS, Cowan N, et al. Parietal-  
485 Occipital Interactions Underlying Control- and Representation-Related Processes in Working  
486 Memory for Nonspatial Visual Features. *J Neurosci.* 2018;38(18):4357-66. Epub 2018/04/11.  
487 doi: 10.1523/JNEUROSCI.2747-17.2018. PubMed PMID: 29636395.
- 488 9. Galeano Weber EM, Peters B, Hahn T, Bledowski C, Fiebach CJ. Superior Intraparietal  
489 Sulcus Controls the Variability of Visual Working Memory Precision. *J Neurosci.*  
490 2016;36(20):5623-35. Epub 2016/05/20. doi: 10.1523/JNEUROSCI.1596-15.2016. PubMed  
491 PMID: 27194340.
- 492 10. Emrich SM, Riggall AC, Larocque JJ, Postle BR. Distributed patterns of activity in  
493 sensory cortex reflect the precision of multiple items maintained in visual short-term memory. *J*  
494 *Neurosci.* 2013;33(15):6516-23. Epub 2013/04/12. doi: 10.1523/JNEUROSCI.5732-12.2013.  
495 PubMed PMID: 23575849; PubMed Central PMCID: PMCPMC3664518.
- 496 11. Riggall AC, Postle BR. The Relationship between Working Memory Storage and  
497 Elevated Activity as Measured with Functional Magnetic Resonance Imaging. *Journal of*  
498 *Neuroscience.* 2012;32(38):12990-8. doi: 10.1523/Jneurosci.1892-12.2012. PubMed PMID:  
499 WOS:000309258100003.
- 500 12. Harrison SA, Tong F. Decoding reveals the contents of visual working memory in early  
501 visual areas. *Nature.* 2009;458(7238):632-5. Epub 2009/02/20. doi: 10.1038/nature07832.  
502 PubMed PMID: 19225460; PubMed Central PMCID: PMCPMC2709809.
- 503 13. Serences JT, Ester EF, Vogel EK, Awh E. Stimulus-specific delay activity in human  
504 primary visual cortex. *Psychol Sci.* 2009;20(2):207-14. Epub 2009/01/28. doi: 10.1111/j.1467-  
505 9280.2009.02276.x. PubMed PMID: 19170936; PubMed Central PMCID: PMCPMC2875116.

- 506 14. Bae GY, Olkkonen M, Allred SR, Wilson C, Flombaum JI. Stimulus-specific variability  
507 in color working memory with delayed estimation. *Journal of Vision*. 2014;14(4):7-. doi:  
508 10.1167/14.4.7.
- 509 15. Bae GY, Olkkonen M, Allred SR, Flombaum JI. Why some colors appear more  
510 memorable than others: A model combining categories and particulars in color working memory.  
511 *J Exp Psychol Gen*. 2015;144(4):744-63. Epub 2015/05/20. doi: 10.1037/xge0000076. PubMed  
512 PMID: 25985259.
- 513 16. Panichello MF, DePasquale B, Pillow JW, Buschman TJ. Error-correcting dynamics in  
514 visual working memory. *Nat Commun*. 2019;10(1):3366. Epub 2019/07/31. doi:  
515 10.1038/s41467-019-11298-3. PubMed PMID: 31358740; PubMed Central PMCID:  
516 PMC6662698.
- 517 17. Papadimitriou C, Ferdoash A, Snyder LH. Ghosts in the machine: memory interference  
518 from the previous trial. *J Neurophysiol*. 2015;113(2):567-77. Epub 2014/11/08. doi:  
519 10.1152/jn.00402.2014. PubMed PMID: 25376781; PubMed Central PMCID:  
520 PMC64297789.
- 521 18. Kok P, Brouwer GJ, van Gerven MA, de Lange FP. Prior expectations bias sensory  
522 representations in visual cortex. *J Neurosci*. 2013;33(41):16275-84. Epub 2013/10/11. doi:  
523 10.1523/JNEUROSCI.0742-13.2013. PubMed PMID: 24107959.
- 524 19. Cai Y, Yu Q, Sheldon AD, Postle BR. The Role of Location-Context Binding in  
525 Nonspatial Visual Working Memory. 2018. doi: 10.1101/352435.
- 526 20. Cai Y, Sheldon AD, Yu Q, Postle BR. Overlapping and distinct contributions of stimulus  
527 location and of spatial context to nonspatial visual short-term memory. *J Neurophysiol*.  
528 2019;121(4):1222-31. Epub 2019/03/12. doi: 10.1152/jn.00062.2019. PubMed PMID:  
529 30856041; PubMed Central PMCID: PMC6485733.
- 530 21. Brainard DH. The Psychophysics Toolbox. *Spat Vis*. 1997;10(4):433-6. Epub  
531 1997/01/01. PubMed PMID: 9176952.
- 532 22. Pelli DG. The VideoToolbox software for visual psychophysics: transforming numbers  
533 into movies. *Spat Vis*. 1997;10(4):437-42. Epub 1997/01/01. PubMed PMID: 9176953.
- 534 23. Bays PM, Catalao RF, Husain M. The precision of visual working memory is set by  
535 allocation of a shared resource. *J Vis*. 2009;9(10):7 1-11. Epub 2009/10/09. doi: 10.1167/9.10.7.  
536 PubMed PMID: 19810788; PubMed Central PMCID: PMC3118422.
- 537 24. Cox RW. AFNI: software for analysis and visualization of functional magnetic resonance  
538 neuroimages. *Comput Biomed Res*. 1996;29(3):162-73. Epub 1996/06/01. PubMed PMID:  
539 8812068.
- 540 25. Mazziotta J, Toga A, Evans A, Fox P, Lancaster J, Zilles K, et al. A probabilistic atlas  
541 and reference system for the human brain: International Consortium for Brain Mapping (ICBM).  
542 *Philos Trans R Soc Lond B Biol Sci*. 2001;356(1412):1293-322. Epub 2001/09/08. doi:  
543 10.1098/rstb.2001.0915. PubMed PMID: 11545704; PubMed Central PMCID:  
544 PMC1088516.
- 545 26. Wang L, Mruczek REB, Arcaro MJ, Kastner S. Probabilistic maps of visual topography  
546 in human cortex. *Cerebral Cortex*. 2015;25:3911-31.
- 547 27. Benjamini Y, Hochberg Y. Controlling the False Discovery Rate - a Practical and  
548 Powerful Approach to Multiple Testing. *Journal of the Royal Statistical Society Series B-*  
549 *Statistical Methodology*. 1995;57(1):289-300. PubMed PMID: WOS:A1995QE45300017.
- 550 28. Bland JM, Altman DG. Calculating correlation coefficients with repeated observations:  
551 part 1—correlation within subjects. *BMJ*. 1995;310:466.

552 29. Raftery AE. Bayesian Model Selection in Social Research. *Sociological Methodology*.  
553 1995;25:111-63.

554 30. Fischl B, Sereno MI, Dale AM. Cortical surface-based analysis. II: Inflation, flattening,  
555 and a surface-based coordinate system. *Neuroimage*. 1999;9(2):195-207. Epub 1999/02/05. doi:  
556 10.1006/nimg.1998.0396. PubMed PMID: 9931269.

557 31. Fischl B, Liu A, Dale AM. Automated manifold surgery: constructing geometrically  
558 accurate and topologically correct models of the human cerebral cortex. *IEEE Trans Med*  
559 *Imaging*. 2001;20(1):70-80. Epub 2001/04/11. doi: 10.1109/42.906426. PubMed PMID:  
560 11293693.  
561

562

563

564

565

566

567

568

569

570

571

572

573

574

575

576

577

578

579



580 **Figure 1**

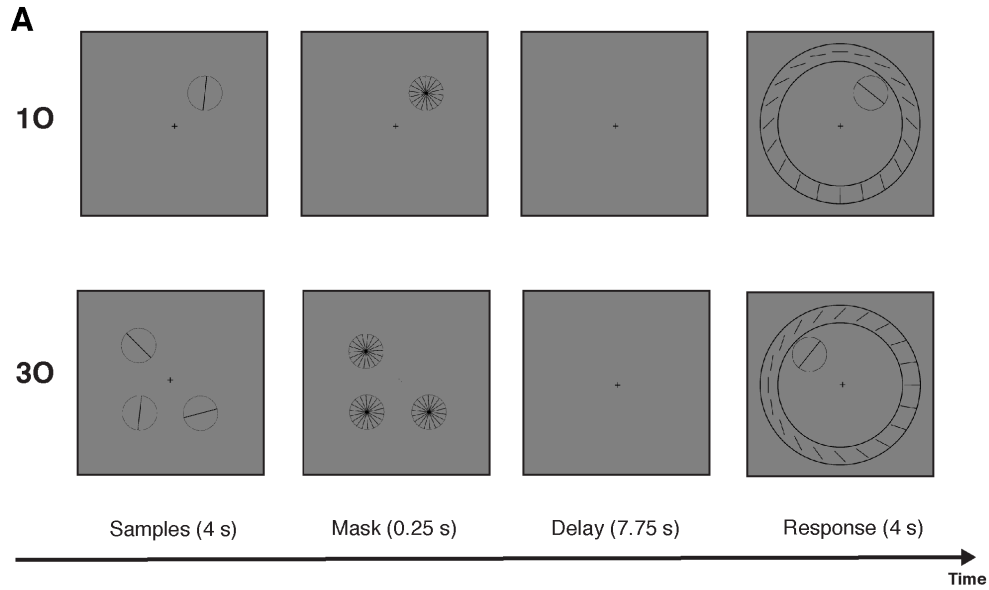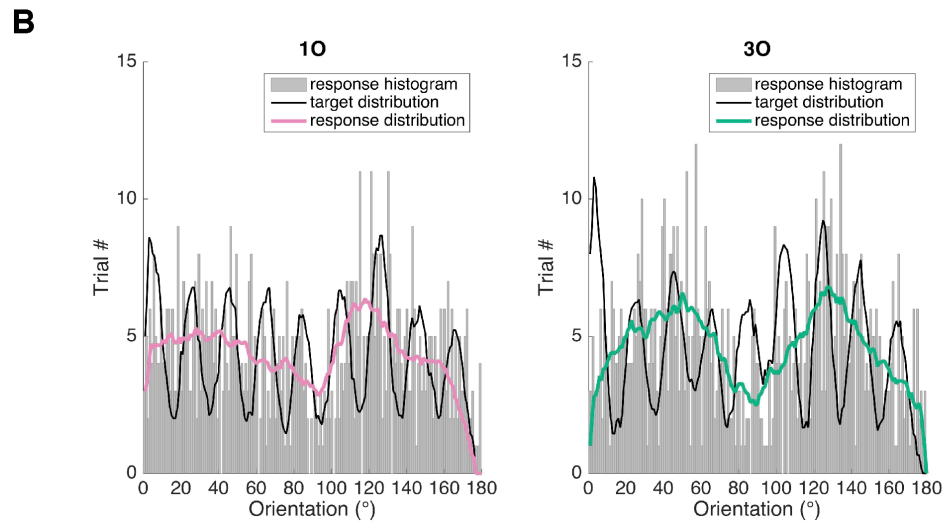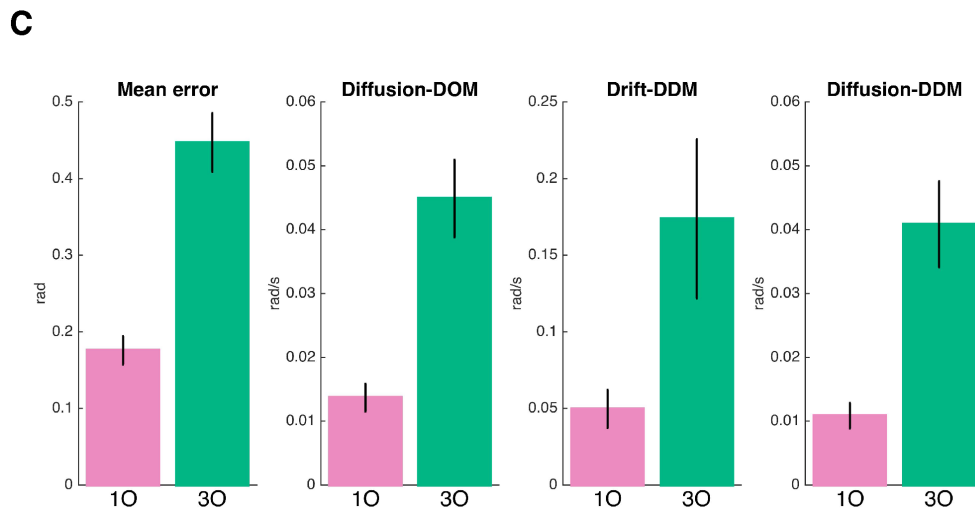

581

582 **Figure 2**

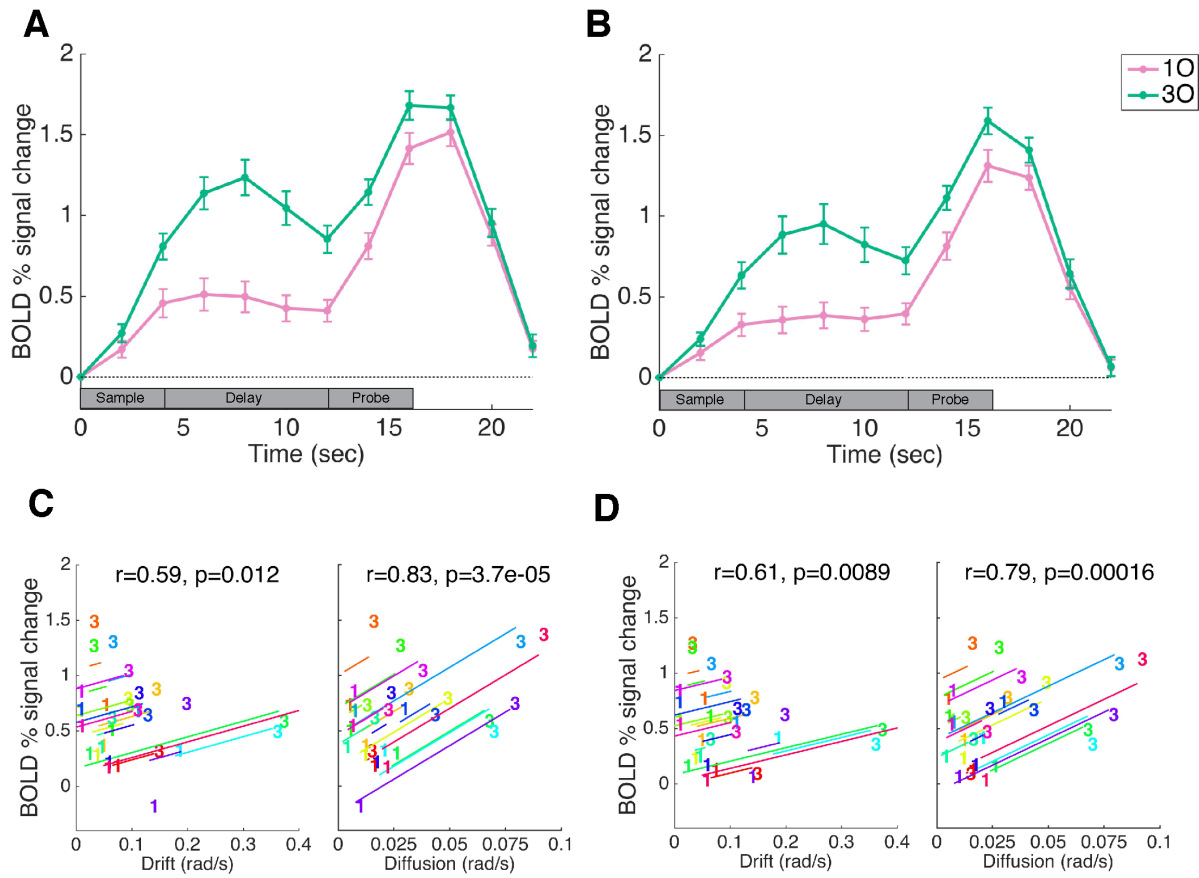

583

584

585

586

587

588

589

590

591

592

593

594 **Figure 3**

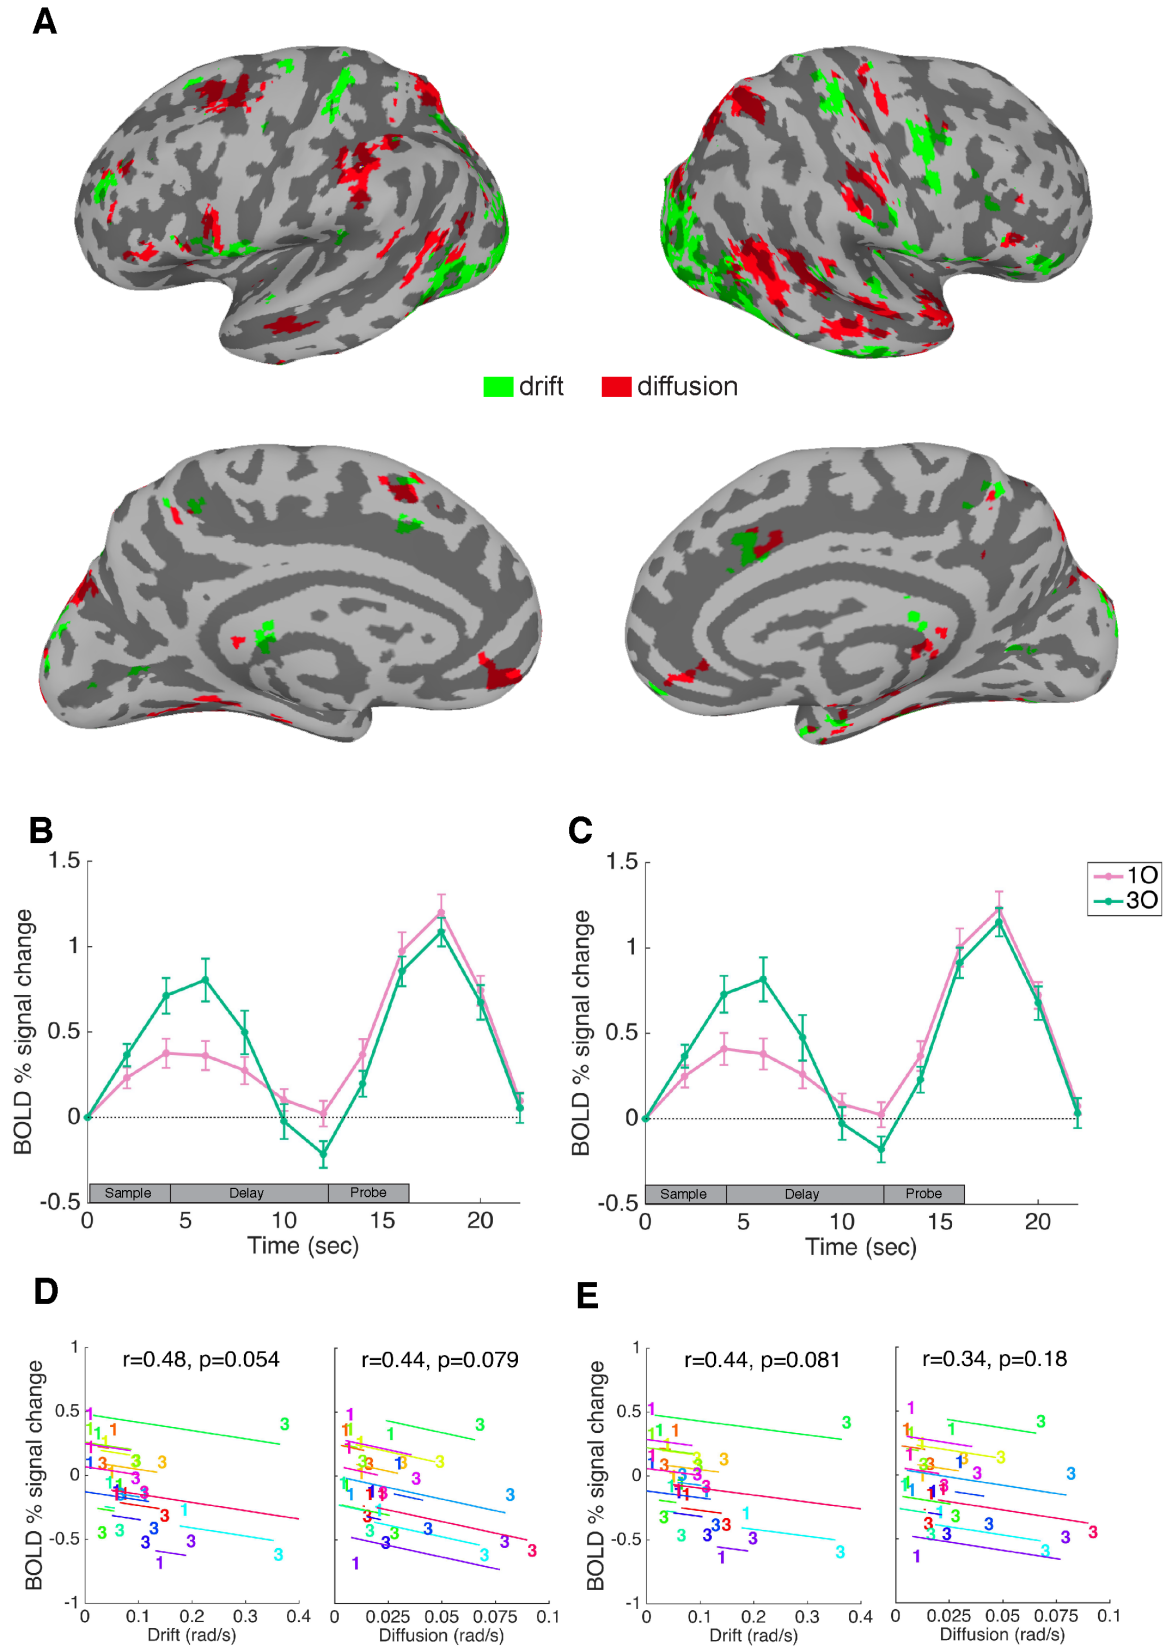

595
